# Supplementary material for: A lobectomy alternative in lung cancer with inflammatory lymph node infiltration: a case report
Source: Research Square preprint supplement (doi:10.21203/rs.3.rs-1564519/v1), 2022-04-21
Supplement: Supplementary file 2 [file 2ad6ce7e5709277dea140756.xlsx]

## Sheet: Sheet1
Table 1 Summary of simulataneous stapling of the lobar root structure for lung cancer
Case	Age (years)	Sex	Histrogical type	Clinical staging	Surgical approach	Resected lobe	treated vessels and bronchus	procedure	cartridge	Operation time (min)	Blood loss (g)	Pathological staging	Reference
1	69	M	ND	T1aN0M0, StageⅠA	VATS	LLL	A6+LLB	AS	green	180	300	T1aN0M0, StageⅠA	1)
2	67	M	ND	T1aN0M0, StageⅠA	VATS	RUL	A2+ULB	AS+suture	green	330	300	T1aN0M0, StageⅠA	1)
3	78	M	ND	T1aN0M0, StageⅠA	VATS	LLL	A6+LLB	AS	green	210	slight	T1aN0M0, StageⅠA	1)
4	77	M	ND	T1bN0M0, StageⅠA	VATS	RML	A5+V5+MLB	AS	green	150	slight	T1aN0M0, StageⅠB	1)
5	66	F	Ad	ND	VATS	LUL	PVS+ULB	AS	green	ND	ND	StageⅠA	4)
6	ND	ND	ND	ND	VATS	RLL	PVI+LLB	AS	green	ND	ND	ND	5)
7	75	F	Ad	T1bN0M0, StageⅠA2	VATS→thoracotomy	RUL	A2+ULB	AS	black	183	70	T1bN0M0, StageⅠA2	our case
M: male, F: female, ND: not described, VATS: video-assisted thoracic surgery, LLL: left lowere lobectomy, RUL: right upper lobectomy, RML: right middle lobectomy, LUL: left upper lobectomy, RLL: right lower lobectomy, LLB: lower lobe bronchus, ULB: upper lobe bronchus, MLB: middle lobe bronchus, AS: auto-stapler
